# Supplementary material for: Targeting of glioblastoma cell lines and glioma stem cells by combined PIM kinase and PI3K-p110α inhibition
Source: PubMed Central journal article supplement (PMC5078085; doi:10.18632/oncotarget.8899), 2016-04-21
Supplement: oncotarget-07-33192-s001.pdf [file oncotarget-07-33192-s001.pdf]

**SUPPLEMENTARY FIGURE**

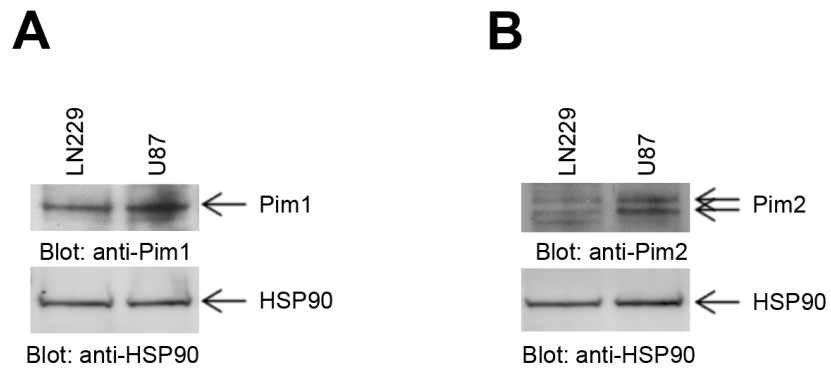

**Supplementary Figure S1: PIM protein expression in GBM cell lines.** A. LN229 and U87 GBM cells were subjected to Western Blot analysis using antibodies for PIM1 and HSP90 (A) or PIM2 and HSP90 B.
